# Supplementary material for: SPARC Inhibits Metabolic Plasticity in Ovarian Cancer
Source: PubMed Central journal article supplement (PMC6209984; doi:10.3390/cancers10100385), 2018-10-16
Supplement: cancers-10-00385-s001.pdf [file cancers-10-00385-s001.pdf]

## SPARC Inhibits Metabolic Plasticity in Ovarian Cancer

Christine Naczki, Bincy John, Chirayu Patel, Ashlyn Lafferty, Alia Ghoneum, Hesham Afify, Michael White, Amanda Davis, Guangxu Jin, Steven Kridel and Neveen Said\*

**Table S1.** Pathway Analysis of Overlapping Genes and Metabolites using Integrated Molecular Pathway Level Analysis (IMPaLA).

| Pathway Name                                                                                                               | Pathway Source | Overlapping Genes                                                         | Overlapping Metabolites        | P_Joint   | Q_Joint  |
|----------------------------------------------------------------------------------------------------------------------------|----------------|---------------------------------------------------------------------------|--------------------------------|-----------|----------|
| The citric acid (TCA) cycle and respiratory electron transport                                                             | Reactome       | <i>SUCLG2; NDUFAB1; ATP5F1; UQCRH; ATP5H; COX5B; NDUFV1; ATP5O; IDH3B</i> | succinate; fumarate            | 2.28E-050 | 0.00801  |
| Respiratory electron transport_ ATP synthesis by chemiosmotic coupling_ and heat production by uncoupling proteins.        | Reactome       | <i>NDUFAB1; ATP5F1; ATP5H; COX5B; NDUFV1; ATP5O; UQCRH</i>                |                                | 0.000843  | 0.0129   |
| Oxidative phosphorylation - Homo sapiens (human)                                                                           | KEGG           | <i>NDUFAB1; ATP5F1; ATP5H; ATP6V1G1; COX5B; NDUFV1; ATP5O; UQCRH</i>      | succinate; fumarate            | 2.00E-050 | 0.000746 |
| Electron Transport Chain                                                                                                   | Wikipathways   | <i>NDUFAB1; ATP5F1; ATP5H; COX5B; NDUFV1; ATP5O; UQCRH</i>                | Succinate                      | 0.000197  | 0.00405  |
| Oxidative phosphorylation                                                                                                  | Wikipathways   | <i>ATP5F1; ATP5O; NDUFAB1; NDUFV1; ATP5H</i>                              |                                | 0.00394   | 0.0443   |
| Formation of ATP by chemiosmotic coupling superpathway of conversion of glucose to acetyl CoA and entry into the TCA cycle | Reactome       | <i>ATP5O; ATP5F1; ATP5H</i>                                               |                                | 0.00709   | 0.0693   |
| Citrate cycle (TCA cycle) - Homo sapiens (human)                                                                           | HumanCyc       | <i>SUCLG2; IDH3B; PGK1; TPI1</i>                                          | succinate; fumarate            | 0.00116   | 0.0158   |
| Citrate cycle (TCA cycle) - Homo sapiens (human)                                                                           | KEGG           | <i>SUCLG2; IDH3B; ACLY</i>                                                | succinate; fumarate            | 0.00101   | 0.0146   |
| adenosine ribonucleotides de novobiosynthesis                                                                              | HumanCyc       | <i>ATP5F1; ATP5H; ATP6V1G1</i>                                            | aspartate; fumarate            | 0.000751  | 0.0118   |
| Warburg Effect                                                                                                             | SMPDB          | <i>SUCLG2; IDH3B; PGK1</i>                                                | succinate; glutamate; Fumarate | 0.00343   | 0.0405   |
| TCA Cycle                                                                                                                  | Wikipathways   | <i>SUCLG2; IDH3B</i>                                                      | succinate; fumarate            | 0.00421   | 0.0465   |

**Table S2.** Comparison expression of SPARC-regulated metabolic genes between cancer and normal ovarian tissues in studies curated from Oncomine.

| Gene                                           | Change    | <i>p</i> Value | No. of Studies | References |
|------------------------------------------------|-----------|----------------|----------------|------------|
| <b>Glycolysis</b>                              |           |                |                |            |
| <i>HK2</i>                                     | increase  | 0.002          | 5              | [1-5]      |
| <i>TPI1</i>                                    | increase  | 4.26E-5        | 5              | [1-5]      |
| <i>PGK1</i>                                    | Increase  | 0.017          | 8              | [1-7]      |
| <i>PHGDH</i>                                   | Increase  | 0.005          | 7              | [1-7]      |
| <b>TCA cycle</b>                               |           |                |                |            |
| <i>SUCLG1</i>                                  | increase  | 0.339          | 7              | [1-6]      |
| <i>SUCLG2</i>                                  | Increase  | 0.006          | 8              | [1-7]      |
| <i>IDH1</i>                                    | Increase  | 8.57E-15       | 6              | [1-6]      |
| <i>IDH3a</i>                                   | Increase  | 0.179          | 5              | [1-4,6]    |
| <i>ME2</i>                                     | Increase  | 8.57E-15       | 6              | [1-6]      |
| <b>OXPHOS</b>                                  |           |                |                |            |
| <b>Complex I: NADH Dehydrogenases</b>          |           |                |                |            |
| <i>NDUFAB1</i>                                 | Increase  | 2.41E-5        | 4              | [1,2,4,5]  |
| <i>NDUFA3</i>                                  | Increase  | 0.18           | 5              | [1-5]      |
| <i>NDUFC2</i>                                  | Increase  | 0.018          | 5              | [1-5]      |
| <i>NDUFS7</i>                                  | increased | 0.917          | 3              | [1,3,4]    |
| <i>NDUFS8</i>                                  | Increase  | 4.7E-5         | 7              | [1-7]      |
| <b>Complex II: Succinate Dehydrogenases</b>    |           |                |                |            |
| <i>SDHA</i>                                    | Increase  | 0.014          | 7              | [1-7]      |
| <i>SDHB</i>                                    | Increase  | 0.012          | 7              | [1-7]      |
| <i>SDHC</i>                                    | increase  | 0.026          | 7              | [1-7]      |
| <i>SDHD</i>                                    | increase  | 0.254          | 5              | [1-5]      |
| <b>Complex III: CoQ Cytochrome C Reductase</b> |           |                |                |            |
| <i>UQCR10</i>                                  | increase  | 0.012          | 5              | [1-5]      |
| <i>UQCRB</i>                                   | Increase  | 0.013          | 6              | [1-5,7]    |
| <i>UQCRH</i>                                   | Increase  | 0.016          | 6              | [1-5,7]    |
| <i>CYCS</i>                                    | increase  | 0.016          | 6              | [1-5,7]    |
| <b>Complex IV: Cytochrome C Oxidase</b>        |           |                |                |            |
| <i>COX5A</i>                                   | Increase  | 1.58E-5        | 7              | [1-5,7]    |
| <i>COX5B</i>                                   | increase  | 7.29E-5        | 7              | [1-4,7]    |
| <i>COX6C</i>                                   | increase  | 0.019          | 5              | [1-4,7]    |

**Table S2. Cont.**

| Gene                           | Change   | p Value  | No. of Studies | References |
|--------------------------------|----------|----------|----------------|------------|
| <b>Complex V: ATP Synthase</b> |          |          |                |            |
| <i>ATP5F1</i>                  | increase | 1.40E-10 | 7              | [1-5, 7]   |
| <i>ATP5D</i>                   | increase | 0.177    | 7              | [1,2,4-7]  |
| <i>ATP5H</i>                   | increase | 0.482    | 7              | [1-6]      |
| <i>ATP5O</i>                   | increase | 0.092    | 7              | [1-5,7]    |

**Table S3. Mouse primer sequences used.**

| Accession No.  | Primer Name    | F 5'-3'              | R 5'-3'                 | Product Size |
|----------------|----------------|----------------------|-------------------------|--------------|
| NR_046235.1    | 18s rRNA       | GTAACCCGTTGAACCCATT  | CCATCCAATCGGTAGTAGCG    | 151          |
| NM_009415.2    | <i>Tpi1</i>    | GTCAATGATGGGGTGGCTCA | GCAGTGCTCATTGTTGGCA     | 169          |
| NC_000072.6    | <i>Hk2</i>     | CGGGAATGGCGTAGATCTGG | GGCCCTCCTTIGTCTGCTAC    | 143          |
| NM_001360744.1 | <i>Ndufab1</i> | CACCCCACTGACGTTAGAC  | GTGAGGAAGAAGGCTCTGATACT | 180          |
| NM_025348.2    | <i>Ndufa3</i>  | GGGAGAATCTCTGCCTTCT  | TCATCTCTCACAGGCACTGG    | 173          |
| NM_016966.3    | <i>Phgdh</i>   | GGAGGCTTCCAGTTCTGCT  | CTGCGATCCCCTCTCCCTAT    | 108          |
| NM_008811.2    | <i>Pdh</i>     | GCAGAAATTCATCCGTGGTT | CTCCCTGCCTTTAGCACAG     | 203          |
| NM_145494.2    | <i>ME2</i>     | TGCGCTCTGCTTAAAGCTG  | TTGGAATTCGGTGAGCACTC    | 135          |
| NM_001111320.1 | <i>Idh1</i>    | TGGCTGCTTGCAATAAAGGC | TTGGCCTGAGCTAATTTGGC    | 112          |
| NM_173011.2    | <i>Idh2</i>    | ATGAACATCGGCTCATCGAC | TTTGCAAGCCCACACAAAGC    | 74           |
| NM_029573.2    | <i>Idh3a</i>   | ACATTGCAGGCAAGGACATG | AAAAGTCCCATGTGGCGAAG    | 79           |
| NM_008828.3    | <i>pgk1</i>    | TTGAATGGGAAGCCTTTGCC | TGTGTTCCATTGGCACAGC     | 128          |
| NM_019879.3    | <i>Suclg1</i>  | TGGCCACATTCACAAGAAGG | TGGGTTGTTGGTGAAGTGC     | 84           |
| NM_011507.3    | <i>Suclg2</i>  | TGCTGAGTTCGACAAAAGG  | TCACGAAGCAGGCAATGTTC    | 128          |
| NM_025523.1    | <i>Ndufc1</i>  | TCGACCGTGTGAAGAGCAG  | TCGACCGTGTGAAGAGCAG     | 70           |
| NM_133666.3    | <i>Ndufo1</i>  | TTTGGCCGAGAACGCAATTC | TGACACCACCAGCATGTTC     | 130          |
| NM_029272.3    | <i>Ndufs7</i>  | TCAAGCGTGAACAGAAGCTG | TCTGGGATTATCGTGCTCAGC   | 71           |
| NM_001271443.1 | <i>Ndufs8</i>  | TTGCCTGCAAACTCTGTGAG | ATGTCATAGCGTGTGTTCCG    | 100          |
| NM_025641.3    | <i>Uqcrh</i>   | TACTCTGGTTGCGCTGTGTG | AGCATCTTTCGTTCTGTCCTC   | 70           |
| NM_026219.2    | <i>Uqcrb</i>   | AAGTGCTGGATGGTTTTTCG | AAAGGTCCTCAGGAAGCCTTC   | 133          |
| NM_007808.4    | <i>Cyca</i>    | TTGGAGTTTTGGGCTGATGG | TTGGCCTCAAGTGTAGTGC     | 111          |
| NM_197979.3    | <i>Uqcr10</i>  | GTTTCAAGTTGCCGTTACC  | GCTGACAGCTGTAACAACAC    | 99           |
| NM_007747.2    | <i>Cox5a</i>   | ATTGATGCCTGGGAATTGCG | TCTACATGCTCGCAATGCAG    | 99           |
| NM_009942.2    | <i>Cox5b</i>   | TGGTTTTGGCTGCACAAAGG | AAGATAACACAGGGGCTCAGTG  | 103          |
| NM_053071.2    | <i>Cox6c</i>   | TGTTGCCCAAACACAGATG  | AACTTATAGGCAGCGGCAAC    | 103          |

|             |              |                     |                     |     |
|-------------|--------------|---------------------|---------------------|-----|
| NM_009944.3 | <i>Cox7a</i> | TGCTGAGGACGCAAATGAG | TTCTCTGCCACACGGTTTC | 101 |
|-------------|--------------|---------------------|---------------------|-----|

Table S3. Cont.

| Accession No. | Primer Name   | F 5'-3'              | R 5'-3'                | Product Size |
|---------------|---------------|----------------------|------------------------|--------------|
| NM_025313.2   | <i>Atp5d</i>  | ACTTTTCCGCCACCATGTTG | GCAAAGGTGAAGGACATCTGTC | 142          |
| NM_009725.4   | <i>Atp5f1</i> | AGAACATGATGCGTCGCAAG | TGAGCCTTCTTTGCAAGCAG   | 142          |
| NM_027862.1   | <i>Atp5h</i>  | TCATGCCCCAAAACCAGAAG | AGTCAATCGCAGGTGGTTTC   | 105          |
| NM_138597.2   | <i>Atp5o</i>  | GCACCGTCAAAGTGAAAAGC | AGGCGACCATTTTCAGCAAG   | 100          |

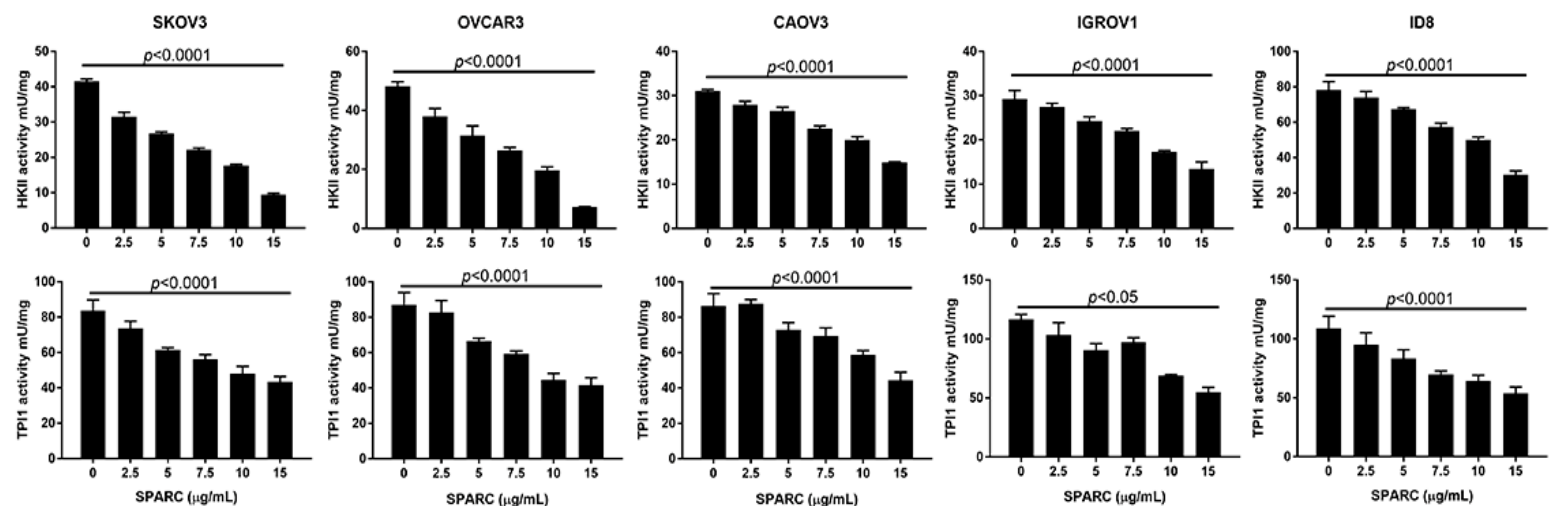

**Figure S1.** Effect of SPARC on activity of HK2 and TPI1 in human and murine OvCa cell lines. Ovarian cancer cell lines were treated with increasing concentrations of rSPARC for 24 h and the enzyme activity was determined as described in Material and Methods. Bars mean  $\pm$  SEM of a representative experiment that was repeated twice with reproducible results ( $n = 3/\text{experimental condition}/\text{experiment}$ ., One-way ANOVA with Tukey's post-hoc multiple comparisons' test.

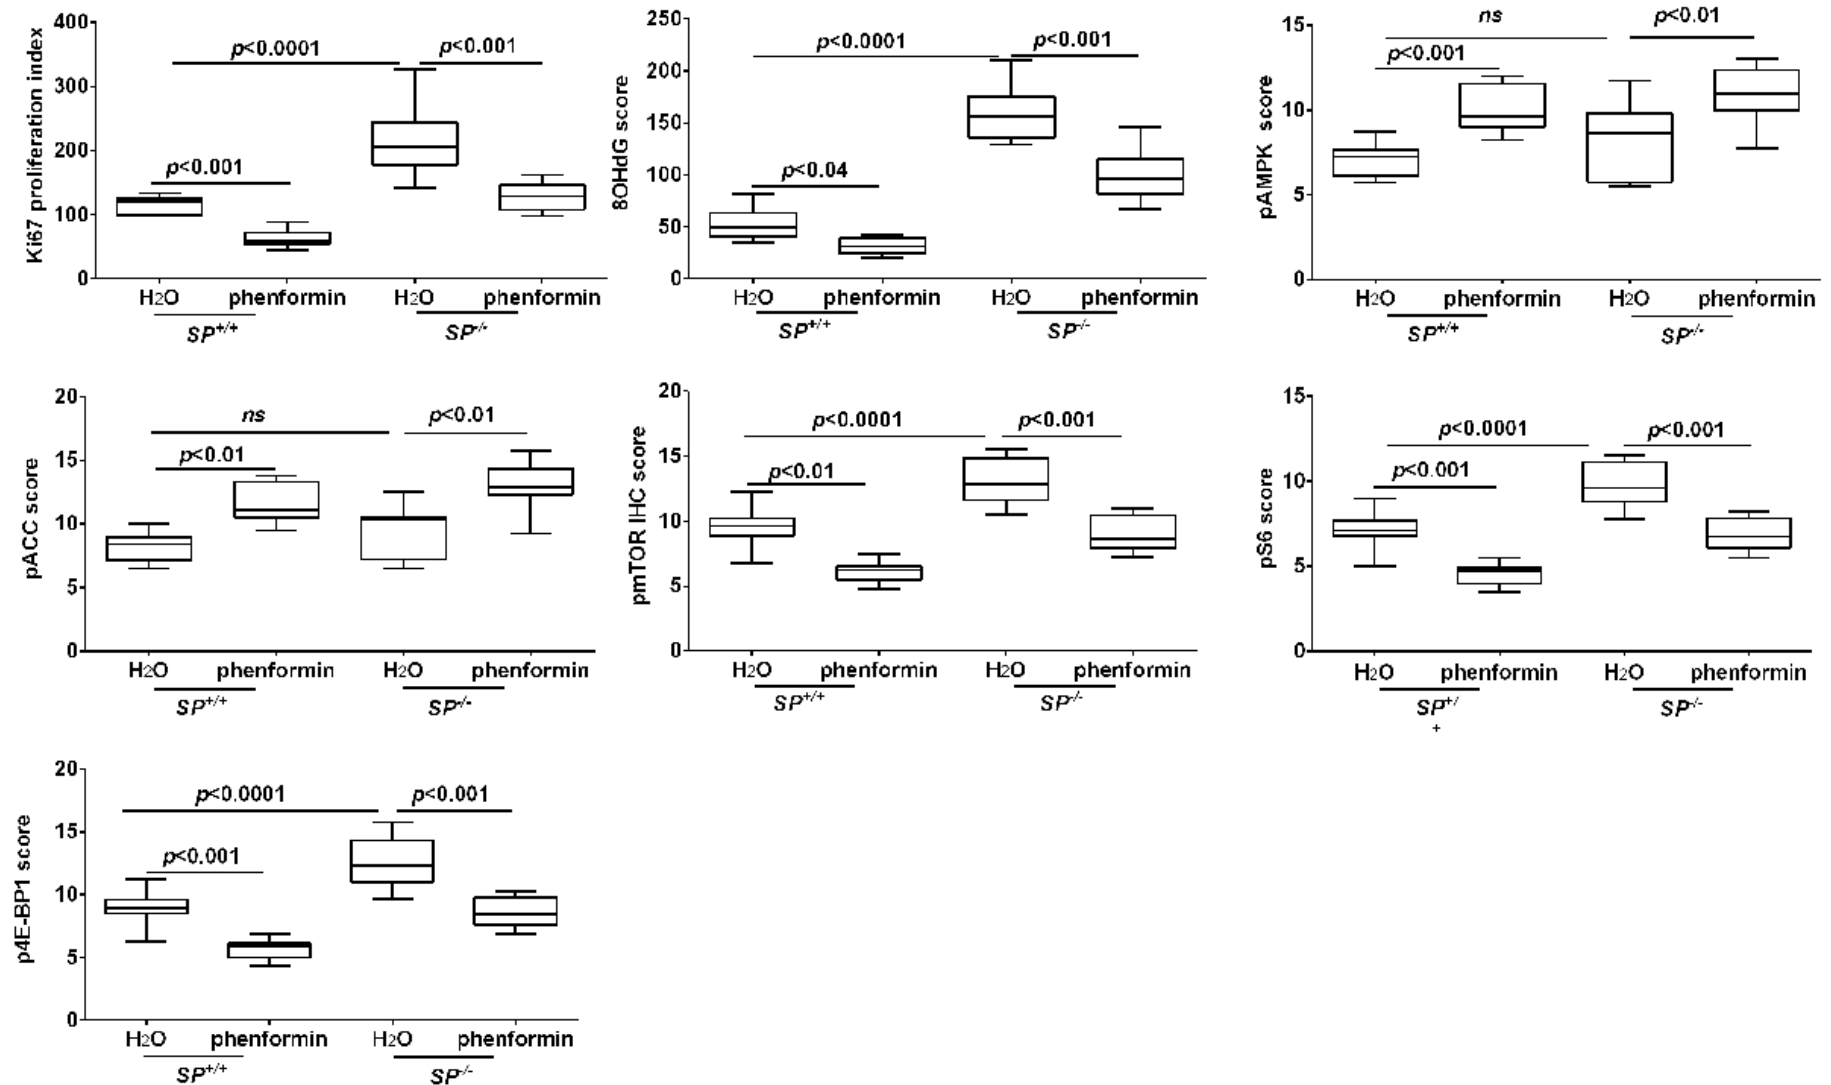

**Figure S2.** Scores of expression scores of immunostaining of syngeneic tumor tissues in Figure 9D. Box plots of IHC scores of the indicated protein expression in syngeneic tumors before and after phenformin treatment.  $p < 0.05$  Mann-Whitney test.

## References

1. Bonome, T.; Levine, D.A.; Shih, J.; Randonovich, M.; Pise-Masison, C.A.; Bogomolny, F.; Ozbun, L.; Brady, J.; Barrett, J.C.; Boyd, J.; et al. A gene signature predicting for survival in suboptimally debulked patients with ovarian cancer. *Cancer Res.* **2008**, *68*, 5478–5486.
2. Hendrix, N.D.; Wu, R.; Kuick, R.; Schwartz, D.R.; Fearon, E.R.; Cho, K.R. Fibroblast growth factor 9 has oncogenic activity and is a downstream target of Wnt signaling in ovarian endometrioid adenocarcinomas. *Cancer Res.* **2006**, *66*, 1354–1362.
3. Lu, K.H.; Patterson, A.P.; Wang, L.; Marquez, R.T.; Atkinson, E.N.; Baggerly, K.A.; Ramoth, L.R.; Rosen, D.G.; Liu, J.; Hellstrom, I.; et al. Selection of potential markers for epithelial ovarian cancer with gene expression arrays and recursive descent partition analysis. *Clin. Cancer Res.* **2004**, *10*, 3291–3300.
4. Network, C.G.A.R. Integrated genomic analyses of ovarian carcinoma. *Nature* **2011**, *474*, 609–615.
5. Yoshihara, K.; et al. Gene expression profiling of advanced-stage serous ovarian cancers distinguishes novel subclasses and implicates ZEB2 in tumor progression and prognosis. *Cancer Sci.* **2009**, *100*, 1421–1428.
6. Adib, T.R.; Henderson, S.; Perrett, C.; Hewitt, D.; Bourmpoulia, D.; Ledermann, J.; Boshoff, C. Predicting biomarkers for ovarian cancer using gene-expression microarrays. *Br. J. Cancer* **2004**, *90*, 686–692.
7. Welsh, J.B., Zarrinkar, P.P.; Sapinoso, L.M.; Kern, S.G.; Behling, C.A.; Monk, B.J.; Lockhart, D.J.; Burger, R.A.; Hampton, G.M. Analysis of gene expression profiles in normal and neoplastic ovarian tissue samples identifies candidate molecular markers of epithelial ovarian cancer. *Proc. Natl. Acad. Sci. USA* **2001**, *98*, 1176–1181.
